# 1 **Phylogenetic scale in ecology and evolution**

2 **Catherine H. Graham**<sup>1</sup>, **Antonin Machac**<sup>2,3,4</sup>, **David Storch**<sup>3,4</sup>

3

4 <sup>1</sup> Department of Ecology and Evolution, 650 Life Sciences Bldg, Stony Brook University, Stony  
5 Brook, NY 11794, USA – <sup>2</sup> Center for Macroecology, Evolution, and Climate, Natural History  
6 Museum of Denmark, Universitetsparken 15, DK 2100 Copenhagen – <sup>3</sup> Department of Ecology,  
7 Vinicna 7, 12844 Prague 2, Czech Republic – <sup>4</sup> Center for Theoretical Study, Jilská 1, 11000  
8 Prague 1, Czech Republic.

9

10 Email contacts: CHG: [catherine.graham@stonybrook.edu](mailto:catherine.graham@stonybrook.edu), AM: [A.Machac@email.cz](mailto:A.Machac@email.cz), DS:  
11 [storch@cts.cuni.cz](mailto:storch@cts.cuni.cz).

12 Author for correspondence: Catherine H. Graham

13 Statement of authorship: The authors conceived and wrote the manuscript together, contributing  
14 equally.

15

16 Keywords: biogeography, community structure, diversification, domains of scale, extent, grain,  
17 macroecology, macroevolution, spatial scale.

18

19 Running title: Phylogenetic scale in ecology and evolution.

20

21 The abstract consists of 139 words, the body of MS has 5245 words, including 893 in boxes; there  
22 are 61 references

23

## 24 **Abstract**

25 It has been widely acknowledged that many phenomena in ecology and evolution depend on spatial  
26 and temporal scale. However, important patterns and processes may vary also across the phylogeny  
27 and depend on phylogenetic scale. Though phylogenetic scale has been implicitly considered in  
28 some previous studies, it has never been formally conceptualized and its potential remains  
29 unexplored. Here, we develop the concept of phylogenetic scale and, building on previous work  
30 in the field, we introduce phylogenetic grain and extent, phylogenetic scaling and the domains of  
31 phylogenetic scale. We use examples from published research to demonstrate how phylogenetic  
32 scale has been considered so far and illustrate how it can inform, and possibly resolve, some of the  
33 longstanding controversies in evolutionary biology, community ecology, biogeography and  
34 macroecology. To promote the concept of phylogenetic scale empirically, we propose  
35 methodological guidelines for its treatment.

36

37

38

39

40

41

42

43

44

45

46

47

48

49

50

51

52

53

54

## 55 **Introduction**

56  
57 Numerous patterns in ecology and evolution vary across the phylogenetic hierarchy (Fig. 1).  
58 Species diversity declines with latitude across higher taxa but not necessarily across their  
59 constituent families and genera (Kindlman *et al.*, 2007). Phylogenetic delimitation of species pools  
60 influences our inferences about the processes that form local communities (Cavender-Bares *et al.*,  
61 2009). Many other, similar examples further illustrate that patterns in ecology and evolution often  
62 depend on phylogenetic scale (Fig. 1). Yet, unlike the extensively developed concepts of spatial  
63 and temporal scale where scale dependence in the patterns and processes driving variation in  
64 diversity has long been acknowledged (Wiens, 1989; Levin, 1992), the importance of phylogenetic  
65 scale has only recently begun to be recognized. Here, we formalize and develop the concept of  
66 phylogenetic scale, summarize how it has been considered across disciplines, provide empirical  
67 guidelines for the treatment of phylogenetic scale, and suggest further research directions.

68  
69 Inspired by the concept of spatial scale (Wiens, 1989; Levin, 1992), we define phylogenetic scale  
70 in terms of phylogenetic grain and phylogenetic extent (Box 1). Phylogenetic grain refers to the  
71 elementary unit of analysis, defined in terms of tree depth, taxonomic rank, clade age, or clade  
72 size. Phylogenetic extent refers to the entire phylogeny encompassing all these units. Exploring  
73 multiple grains and extents should provide relevant insights about the mechanisms that have  
74 produced a pattern of interest. For example, the number of families in the fossil record appears to  
75 be constant while the number of genera seems to increase continually over geological time,  
76 suggesting that different mechanisms produce genus-level and family-level diversity (Benton &  
77 Emerson, 2007). In community ecology, clade-wide analyses typically suggest that communities  
78 have been shaped by environmental filters while focused analyses of narrowly defined clades often  
79 implicate a suite of additional mechanisms (e.g. competition, mutualisms, dispersal limitation;  
80 Cavender-Bares *et al.*, 2009). Different patterns, and by extension different inferences about the  
81 underlying processes, might therefore emerge across the continuum of phylogenetic scales.

82  
83 The concept of phylogenetic scale seems particularly pertinent given the growing body of research  
84 and statistical methods to explore the increasingly accurate and ever more complete phylogenetic  
85 data (Table 1). Yet, few studies have extended the explorative strategies to systematically

86 investigate phylogenetic scale-dependence (upscaling, downscaling), delimit phylogenetic  
87 domains of ecological theories (e.g. niche conservatism, environmental filtering and competition),  
88 or test the universality of ecological laws (e.g. species-abundance distributions, latitudinal  
89 gradients). We contend that the full potential of the phylogenetic data, and the methods at hand,  
90 have not yet been fully realized, and further progress might be precipitated by a more focused and  
91 formalized treatment of phylogenetic scale, akin to that commonly applied across temporal and  
92 spatial scales (Wiens, 1989; Levin, 1992).

93  
94 Here we overview the variety of ways in which different disciplines have either implicitly or  
95 explicitly considered phylogenetic scale, highlighting their respective benefits and pitfalls. We  
96 further propose how these efforts might be consolidated under one conceptual and empirical  
97 framework that would provide the common ground for cross-disciplinary discussion. In particular,  
98 we define and formalize the concept of phylogenetic scale, distinguish between phylogenetic grain  
99 and extent, scale-dependence, phylogenetic scaling and the domains of scale. We also provide  
100 practical guidelines for the treatment of phylogenetic scale across empirical studies, using the data  
101 and statistical methods currently available. We hope this will inspire further debate, draw more  
102 focused attention to the subject, and advance the notion of phylogenetic scale in ecology and  
103 evolution.

104

## 105 **Phylogenetic scale in ecology and evolution**

106

107 Phylogenetic scale has been considered to varying degrees in ecology and evolution, from being  
108 largely neglected to being relatively well-developed. In this section, we describe research that has  
109 implicitly or explicitly considered phylogenetic scale and suggest how different disciplines might  
110 further benefit from this concept.

111

### 112 **Evolution and diversification**

113 Evolutionary diversification and disparification are known to vary across phylogenetic scales but  
114 have rarely been thoroughly studied in this context. Even though a suite of methods is commonly  
115 used to explore these processes across the phylogeny (Alfaro *et al.*, 2009; Rabosky *et al.*, 2012)  
116 (Table 1), most studies report the recovered patterns without a focused examination of their scale-

117 **Figure 1.** Examples of patterns that vary across phylogenetic scales. (a) The latitudinal diversity  
118 gradient. Mammal diversity decreases with latitude across large clades but many other patterns  
119 emerge across small clades, including inverse ones (selected clades depicted in black). (b) The  
120 dependence of population abundance on body mass. The dependence is negative across large  
121 phylogenetic scales (mammals depicted in grey) but varies substantially across small scales  
122 (selected orders depicted in black). (c) Diversification dynamics. Slowdowns detected over some  
123 phylogenetic scales might be accompanied by accelerations over both larger and smaller scales.  
124 (d) Statistical correlations. Even though the depicted variables are negatively correlated within  
125 each of the two subclades, the correlation becomes positive when the subclades are studied  
126 together. The data were taken from the IUCN (<http://www.iucnredlist.org>) and PanTHERIA  
127 (<http://esapubs.org/Archive/ecol/E090/184/default.htm>).

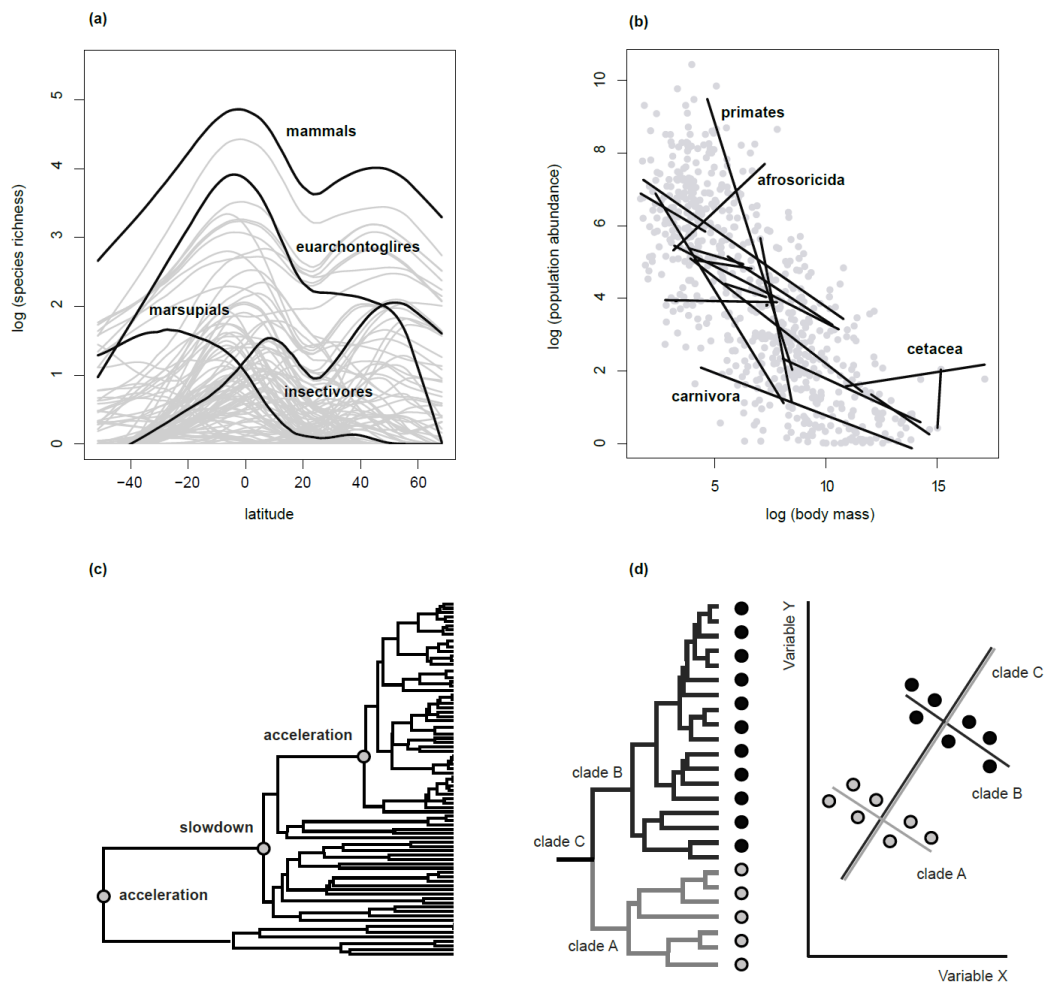

128 **BOX 1: The concept of phylogenetic scale**

129 The concept of scale is based on the fact that some entities can be ordered, or placed on a scale  
130 (*scala* means *ladder* in Latin). For example, continents contain biomes, ecoregions, and localities,  
131 giving rise to spatial hierarchy. Similarly, large clades contain small clades, creating phylogenetic  
132 hierarchy which defines phylogenetic scale. However, clades are not always nested, in which case  
133 standard measures might be needed to order the clades along the scale continuum. These measures  
134 might include time (clade age) but also clade size (number of species within a clade) or the degree  
135 of molecular, phenotypic, or ecological divergence within a clade. These measures will be  
136 inherently correlated across mutually nested clades but might become decoupled across non-nested  
137 clades (e.g. old clades will not necessarily be most diverse) (Box 2).

138 In the concept of spatial scale, **grain** and **extent** are usually distinguished. Grain refers to  
139 the area of the basic unit analyzed (e.g. ecoregion) while extent refers to the total area analyzed  
140 (e.g. continent). Phylogenetic scale can be defined analogically, such that phylogenetic grain refers  
141 to the basic unit of analysis (e.g. species, genera, families) and phylogenetic extent to the total  
142 phylogeny that would encompass all the units analyzed (e.g. class, phylum).

143 Even though taxonomic ranks are commonly used to define phylogenetic scale, they are  
144 not always comparable (e.g. genera in mammals are not comparable to genera in insects), and  
145 standardized measures might be better suited to define phylogenetic scales across distant taxa (e.g.  
146 taxon age, taxon size). However, even these measures might not ensure entirely that the analyzed  
147 taxa are fully comparable. For example, clade age might reflect the degree of phenotypic  
148 divergence across clades, but some clades might be more diverged than others despite being of  
149 similar age. The same limitations apply to the measures of spatial scale because spatial grains of  
150 standardized sizes might not ensure comparability across species of dramatically different home  
151 range sizes (Wiens 1989). Therefore, the most suitable measure and definition of the phylogenetic  
152 scale should be dictated by the biological properties of the organismal system (e.g. body size,  
153 generation time, rates of phenotypic evolution) and the question under study (e.g. phenotypic  
154 divergence, diversification dynamics, diversity patterns).

155 In some cases, it may be useful to work with non-standardized grains which represent more  
156 natural units of analysis (e.g. islands in spatial scaling or island faunas in phylogenetic scaling).  
157 The extents will then be defined correspondingly, so as to cover all of the units analyzed (e.g. all  
158 islands or the entire biotas across islands). Finally, grain and extent are defined only in relation to  
159 each other. The grain from one study can therefore act as an extent in another study, or vice versa.

160 **FIGURE (Box 1):** Geographic and phylogenetic scale.

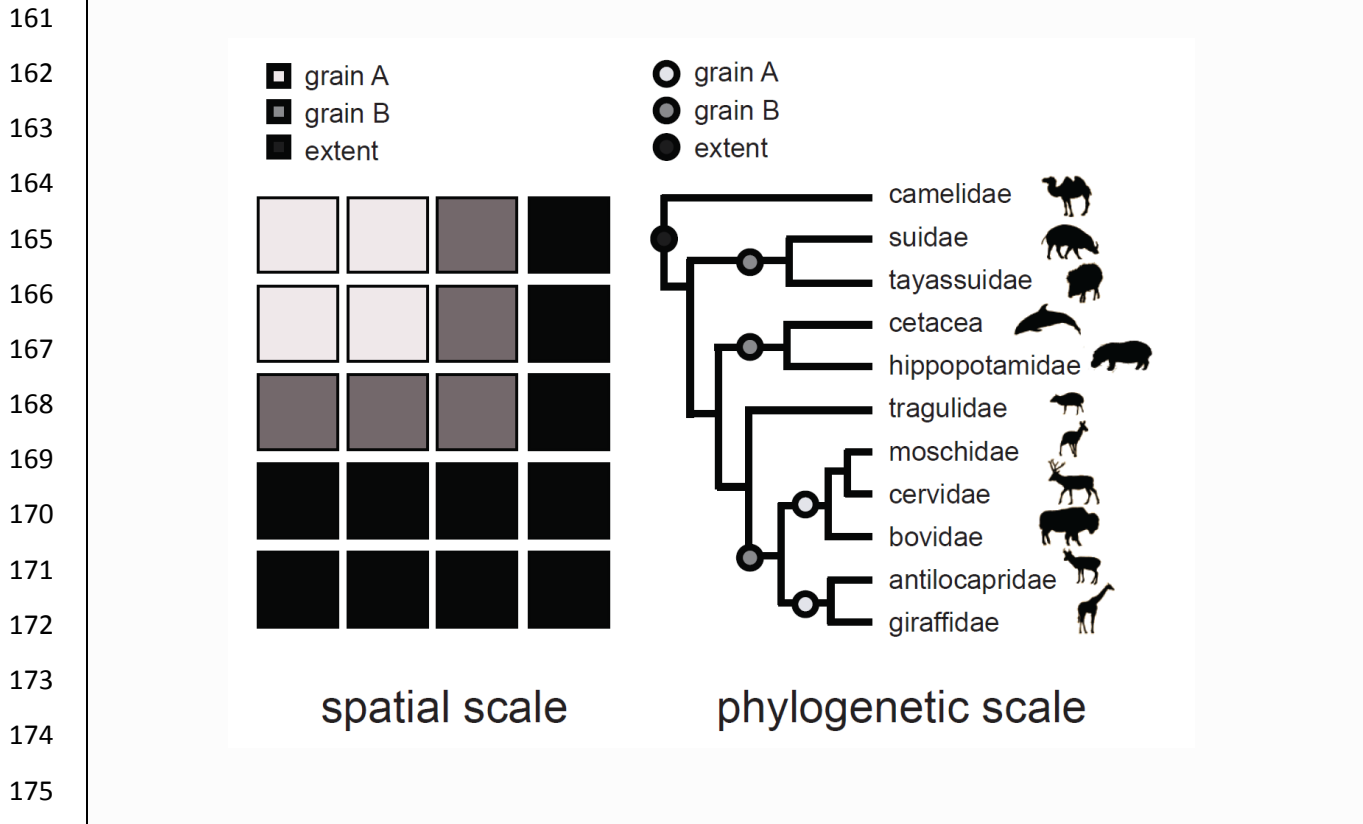

176

177

178 dependence. However, focused examination of patterns across scales may precipitate the  
179 resolution of several outstanding controversies in the field.

180

181 One such controversy revolves around the dynamics of diversity and diversification. It has been  
182 debated whether the dynamics are expansionary, such that regional and clade diversity accumulate  
183 constantly over time (Benton & Emerson, 2007; Wiens, 2011; Harmon & Harrison, 2015), or  
184 whether the dynamics are ecologically limited, such that diversity tends toward an equilibrium  
185 (Rabosky, 2009; Rabosky & Hurlbert, 2015). Empirical evidence suggests that genera with dozens  
186 of species often expand in terms of their diversity (Benton & Emerson, 2007; Wiens, 2011)  
187 whereas higher taxa with thousands of species seem to be mostly saturated at their equilibrium  
188 diversity (Rabosky & Hurlbert, 2015). Island radiations and fossil evidence also indicate that  
189 clades often expand, seemingly without bounds, during the initial phases of their diversification  
190 but eventually reach an equilibrium and saturate (Alroy, 1996; Benton & Emerson, 2007; Glor,  
191 2010; Quental & Marshall, 2013). It is therefore possible that diversification varies systematically

192 across phylogenetic scales such that seemingly contradictory dynamics (i.e. expansionary and  
193 equilibrial) might be detected even within the same phylogenetic tree. If this is the case, the debate  
194 as to whether the dynamics are expansionary or equilibrial might not prove particularly productive  
195 and should perhaps be reframed in terms of phylogenetic scale. For example, we could investigate  
196 phylogenetic scales over which the different dynamics prevail, the scale-related factors that  
197 determine the shifts between the dynamics, or how the dynamics combine across scales and nested  
198 clades of different ages and sizes to produce emergent diversification dynamics.

199  
200 Evolutionary disparification may also vary across the phylogeny because traits (phenotypic,  
201 behavioral, but also molecular) diverge at different rates and, therefore, are conserved over  
202 different phylogenetic scales (Freckleton *et al.*, 2002). Even though the dynamics of trait  
203 divergence and niche conservatism have been the subject of much research, clear generalizations  
204 about their scale-dependence have not yet emerged. In most cases, physiological traits that largely  
205 determine the extent of species distributions seem conserved over extensive phylogenetic scales  
206 (Freckleton *et al.*, 2002) while habitat- and diet-related traits that mediate species coexistence  
207 locally are generally labile and conserved over small scales (Buckley *et al.*, 2010). However, the  
208 opposite pattern has also been observed where physiological tolerances are conserved over small  
209 scales while habitat, diet, body size, and feeding method remain unchanged for most of a clade's  
210 history (Price *et al.*, 2014).

211  
212 These mixed results suggest that temporal scale may be insufficient to fully capture the variance  
213 in niche conservatism. Niches and traits may evolve at different rates even across closely related  
214 clades (e.g. due to clade-specific selection regimes, genetic architecture, pleiotropy) that span  
215 similar temporal scales. For example, one clade may have undergone an explosive radiation on an  
216 island while another accumulated only limited morphological, ecological, and species diversity on  
217 the mainland. In such a case, it would be useful to use a time-independent measure of phylogenetic  
218 scale, such as the degree of molecular or phenotypic divergence, to delimit clades that are mutually  
219 comparable. Consequently, the concept of phylogenetic scale may encourage a more realistic and  
220 potentially more accurate way of thinking about trait evolution and niche conservatism.

221

222

223



## 224 **Community ecology**

225 Patterns of community phylogenetic structure, and hence the inferred processes that shape  
226 communities, can vary with phylogenetic scale (Cavender-Bares *et al.*, 2009; Munkemuller *et al.*,  
227 2014). Community ecology represents one of the disciplines where patterns and processes have  
228 already been analyzed in relation to phylogenetic scale, illustrating the theoretical and empirical  
229 potential of the concept. However, while community phylogeneticists have long been aware of this  
230 fact (Webb *et al.*, 2002; Cavender-Bares *et al.*, 2009), most studies routinely do not recognize the  
231 influence of phylogenetic scale on their results.

232  
233 To study the phylogenetic structure of a community, researchers calculate standardized community  
234 metrics (e.g. the net relatedness index, NRI; Table 1) that compare the observed values to the null  
235 expectation based a model in which species are drawn randomly from a regional species pool.  
236 Different phylogenetic delimitations of the species pool can produce different results which  
237 provides insights into the mechanisms that mediate local coexistence of different suites of species  
238 (Cavender-Bares *et al.*, 2009; Lessard *et al.*, 2012). Species pools that encompass large phylogenic  
239 extents often indicate that the studied communities were formed by environmental filters while  
240 narrowly defined pools produce results suggestive of competition, mutualism, or dispersal  
241 limitation within the community (Swenson *et al.*, 2007; Parra *et al.*, 2011).

242  
243 The interpretation of community structure has been recently under increasing scrutiny because  
244 different processes can produce similarly structured communities (Mayfield & Levine, 2010;  
245 Gerhold *et al.*, 2015) and a single metric may not capture community structure well enough to  
246 identify the processes that may have produced it (Gerhold *et al.*, 2015). The evaluation of how  
247 community structure changes across phylogenetic scales, potentially using recently developed  
248 statistical approaches (see Table 1) might be a particularly powerful strategy to capture community  
249 structure more completely and disentangle the interplay of processes that have produced the  
250 community. We also advocate that community metrics are complemented by experimental results  
251 if possible (Godoy *et al.*, 2014). Taken together, despite some of the recently raised limitation of  
252 community phylogenetics, further advances in the field are certainly possible (e.g. analysis of  
253 multiple metrics across phylogenetic scales; experimental work targeting different scales) and hold  
254 the promise of a more conclusive interpretation of community-level patterns and the ecological  
255 processes behind them.

## 256 **Biogeography and niche conservatism**

257 Biogeographic patterns, such as species distributions and diversity gradients, are largely shaped  
258 by ecological niche conservatism (Wiens & Graham, 2005), and much literature been dedicated  
259 to the question whether or not the niches are conserved (Freckleton *et al.*, 2002; Wiens & Graham,  
260 2005; Losos, 2008). Instead of investigating whether niches are conserved or not, however, we  
261 should perhaps ask over which phylogenetic scales they are conserved and how this scale-  
262 dependence contributes to biogeographic patterns.

263  
264 Diversity gradients vary dramatically across taxa (Fig. 1), and this variation may result from the  
265 fact that climatic niches are conserved over different phylogenetic scales across taxa (Wiens &  
266 Donoghue, 2004; Buckley *et al.*, 2010). In mammals, many ancient lineages failed to colonize high  
267 latitudes (e.g. treeshrews, sloths, armadillos), presumably because their physiological tolerances  
268 have been conserved over larger phylogenetic scales than those of lineages (e.g. rabbits and hares)  
269 that have not only invaded high latitudes, but also diversified there (Buckley *et al.*, 2010). This  
270 occasional breakdowns of niche conservatism, which typically span only a short period in the  
271 history of a clade and limited phylogenetic scales, sometimes precipitate diversification episodes  
272 that significantly enrich the diversity of the regional biota (e.g. ray-finned fishes and angiosperm  
273 plants) (Glor, 2010; Rabosky *et al.*, 2013). The phylogenetic scale over which niches are conserved  
274 may consequently contribute to the formation of diversity patterns.

275  
276 Diversity patterns may be further influenced by the effects of niche conservatism on regional  
277 extinctions (Cahill *et al.*, 2013). Many genera whose climatic niches were conserved over  
278 phylogenetic scales that extended beyond the timeframe of the climatic changes during the  
279 Pleistocene were wiped out by these changes (e.g. North American trees, European megafauna)  
280 (Stuart, 1991; Jackson & Weng, 1999). Yet, the Pleistocene changes in climate have exterminated  
281 only few families, perhaps because climatic niches are less conserved at the family-level than at  
282 the genus-level (Freckleton *et al.*, 2002). The extinction footprint of climate change therefore  
283 likely depends on the phylogenetic scale at which climatic niches are conserved. Evaluating scale-  
284 dependent vulnerability to extinction seems particularly relevant in the face of the on-going  
285 worldwide changes in climate and land use, and the results of such research might afford insights  
286 into the patterns of loss of phylogenetic diversity. In sum, even though it has long been recognized  
287 that niches are conserved to varying degrees, few studies have systematically investigated this

288 variation across the phylogeny despite the potentially promising insights that such an investigation  
289 could contribute to the study of biodiversity patterns.

290

## 291 **Macroecology**

292 Macroecologists, concerned mostly with statistical patterns across large spatial and temporal  
293 scales, rarely consider phylogenetic scale in their research. Yet, cross-scale comparisons can  
294 identify statistical patterns (e.g. latitudinal diversity gradient, body size distributions, species-area  
295 relationship, species-abundance distributions) that are truly universal and those that disintegrate  
296 across phylogenetic scales (Storch & Sizing, 2008). Phylogenetic scale may therefore inform us  
297 about the generality of statistical patterns in ecology and about the mechanisms (e.g. mathematical,  
298 geometric, random sampling, or biological) that likely produced them.

299

300 Many of the patterns originally considered universal have later been shown to disintegrate across  
301 certain phylogenetic scales. The latitudinal diversity gradient, as discussed above, provides a very  
302 intuitive example where the pattern holds across most higher taxa (e.g. mammals, birds,  
303 amphibians, reptiles, plants) but often breaks down across their constituent lower taxa that  
304 encompass limited phylogenetic scales (e.g. penguins, hares, aphids, ichneumonids, Proteacea)  
305 (Kindlman *et al.*, 2007; Fig. 1a). Likewise, species abundance and body mass are negatively  
306 correlated across birds and mammals (Damuth, 1981), but the correlation disappears across  
307 narrowly defined taxa (Isaac *et al.*, 2011) and even becomes positive in some tribes of birds  
308 (Cotgreave & Stockley, 1994; Fig. 1b). Within large phylogenetic extents, small-bodied species  
309 can reach high abundances because their low metabolic requirements raise the carrying capacities  
310 of their populations. However, within restricted phylogenetic extents, local abundance becomes  
311 constrained by competition between closely related species, and large-bodied species become  
312 locally abundant because of their competitive superiority, thus reversing the directionality of the  
313 correlation between body size and population abundance across phylogenetic scales (Cotgreave &  
314 Stockley, 1994; Fig. 1b).

315

316 Theoretical and empirical exploration of the variation of macroecological patterns across  
317 phylogenetic scales may shed light into the universality of these patterns. The species-area  
318 relationship (SAR) and species-abundance distribution (SAD) were traditionally believed to  
319 universally conform to certain mathematical forms (the power-law function and the lognormal

320 distribution, respectively) (Preston, 1948; Rosenzweig, 1995). However, if two sister clades follow  
321 power-law SARs and lognormal SADs which differ in their parameters, it can be proven  
322 mathematically that the clade containing both sister taxa cannot follow either the power-law SAR  
323 or the lognormal SAD (Storch & Sizing, 2008; Sizing *et al.*, 2009). Therefore, even though some  
324 macroecological patterns represent classic examples of ecological laws, cross-scale analyses can  
325 indicate that they are not truly universal, and, as was the case for the relationship between species  
326 abundance and body mass, can sometimes provide insights into the biological mechanisms behind  
327 them.

328 The fact that some statistical patterns do not hold across phylogenetic scales implies either that the  
329 theories that assume patterns are universal (e.g., those theories based on geometry) are  
330 fundamentally ill-founded; instead a pattern possibly pertains to select phylogenetic scales only  
331 (Storch & Sizing, 2008). The latter would suggest that phylogenetic scales form phylogenetic  
332 domains (Box 2) within which the processes hypothesized by a theory operates, and the explicit  
333 delimitation of these domains might further inform the theory (see Box 2).

334

## 335 **Phylogenetic scale in practice**

336

337 The above overview demonstrates that the consideration of phylogenetic scale varies across fields,  
338 both in terms of the approach used to consider phylogenetic scale and the vocabulary used to  
339 describe it. Therefore, there is value in developing a common language to discuss and study  
340 phylogenetic scale. There are two general approaches with which phylogenetic scale can be  
341 considered in ecological and evolutionary research. One is exploratory, where patterns are  
342 identified across a range of phylogenetic scales and then explained in the light of specific events  
343 or mechanisms. The other approach relies on testing a priori hypotheses, which are based on  
344 mechanisms that presumably take place at a given phylogenetic scale. Both approaches have their  
345 strengths and either may be appropriate, depending on the objective of a given study; however, we  
346 advocate the hypotheses testing approach for most questions.

347

348 To study the effects of phylogenetic scale, one can evaluate how a specific attribute of interest  
349 (such as diversification rate, niche conservatism, geographic distribution, statistical relationships)  
350 changes with phylogenetic scale. These attributes may vary randomly or systematically across the

**Table 1.** Ecological and evolutionary attributes that often vary across phylogenetic scales. Each attribute is listed along with examples of methods for its evaluation.

| <b>Field</b>                         | <b>Examined attribute</b>    | <b>Examples of evaluation methods</b>                                                                              |
|--------------------------------------|------------------------------|--------------------------------------------------------------------------------------------------------------------|
| <b>Evolution and diversification</b> | diversification mode         | coalescent inference to distinguish between accelerations, slowdowns, and saturation (Morlon <i>et al.</i> , 2010) |
|                                      | diversification rate         | product-moment estimators (Magallon & Sanderson, 2001), equal-splits measures (Jetz <i>et al.</i> , 2012)          |
|                                      | slowdown strength            | gamma statistic (Pybus & Harvey, 2000)                                                                             |
| <b>Community ecology</b>             | community structure          | phylogenetics (NRI, NTI, MNND, MPD) (Webb <i>et al.</i> , 2002)                                                    |
|                                      | phylogenetic diversity       | Faith's PD (Faith, 1992)                                                                                           |
| <b>Biogeography and macroecology</b> | form of the relationship     | linear, polynomial, exponential, lognormal functions                                                               |
|                                      | strength of the relationship | Pearson's correlation, Spearman's correlation, regression slope                                                    |
| <b>Niche conservatism</b>            | phylogenetic signal          | Pagel's lambda (Freckleton <i>et al.</i> , 2002),<br>Blomberg's K (Blomberg <i>et al.</i> , 2003)                  |
|                                      | evolutionary rates           | Brownian motion model (Felsenstein, 1985), Ornstein-Uhlenbeck model of trait evolution (Hansen, 1997)              |

351  
352  
353  
354  
355  
356  
357  
358  
359  
360  
361  
362  
363  
364  
365  
366  
367  
368

369 **BOX 2: Research across phylogenetic scales**

370 Many attributes, such as diversification rate, niche conservatism, or community structure, vary  
371 across phylogenetic scales (Table 1). They may vary in three different ways:

372 **(a) Scale dependence** refers to the situation when the studied attribute varies across phylogenetic  
373 scales without any obvious trend. In this case, the suitable scale of investigation should be defined  
374 a priori, based on the objective of the study. The results from one scale will be difficult to  
375 extrapolate to other scales.

376 **(b) Scaling** occurs when the attribute of interest varies systematically along the scale axis. The  
377 interpretation of scaling is at least threefold, depending on the underlying mechanism (note that  
378 only one of the interpretations is biological):

379 1. **Statistical scaling** is a sample-size effect whereby the statistical power of the analysis increases  
380 with clade size. Consequently, the attribute under study appears to change systematically from  
381 small clades to large clades (Machac *et al.*, 2012). While the inferred values of the attribute  
382 itself may be technically correct, their systematic variation across scales is biologically  
383 irrelevant.

384 2. **Methodological artifacts** result when a statistical analysis becomes increasingly misleading  
385 toward the deep nodes of the phylogeny, resulting in incorrect and potentially biased estimates  
386 for the attribute of interest (e.g. ancestral reconstructions under dispersal-vicariance models  
387 tend to suggest that the ancestor occupied all of the regions examined) (Ronquist, 1997).  
388 Methodological artifacts can be mitigated under various statistical corrections or when the  
389 results are validated using supplementary data, such as fossils.

390 3. **Phylogenetic scaling in the strict sense** occurs when the studied attribute changes across scales  
391 because the underlying biological process changes. True scaling can therefore inform us about  
392 the processes which generate the patterns observed across scales. If the scaling can be  
393 described mathematically, it may allow to extrapolate across scales, even those not included  
394 in the original study, i.e. *downscale* or *upscale* the patterns under study.

395 **(c) Domains of scale** refer to the segments of the phylogeny (e.g. taxonomic units, tree depth,  
396 distinct clades) within which the attribute of interest appears relatively unchanged. The attribute  
397 might change abruptly between domains, indicating changes in the underlying biological  
398 processes. Therefore, it should be possible to extrapolate across phylogenetic scales within  
399 domains, but not across scales between them.

400 **FIGURE (BOX 2):** Numerous attributes can be studied across phylogenetic scales. These may  
401 include diversification measures, statistical relationships between ecological variables, parameters  
402 of frequency distributions, metrics that describe community phylogenetic structure, or measures  
403 of niche conservatism (see Table 1). Phylogenetic scale can be defined in terms of clade age, clade  
404 size, taxonomic rank, the degree of molecular or phenotypic divergence, etc., depending on the  
405 question under study.

406

407

408

409

410

411

412

413

414

415

416

417

418

419

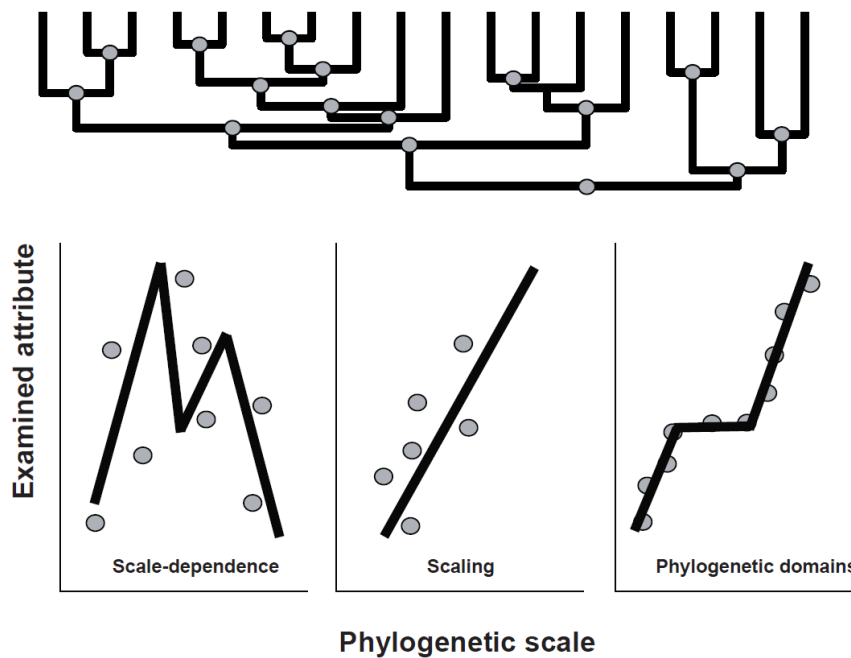

420

421 phylogeny, be more prevalent at particular scales, or stay unchanged across a discrete set of  
422 mutually nested clades (Box 2). We refer to the latter as a domain of phylogenetic scale which, in  
423 analogy to spatial domains (Wiens, 1989), corresponds to a segment of phylogeny that reveals  
424 homogeneity in the attribute of interest. In this section, we consider conceptual and methodological  
425 approaches to explore patterns which are phylogenetic scale-dependent.

426

427

428

## 429 **Choice of phylogenetic scale**

430 While most researchers are aware that the choice of scale can influence inferences about patterns  
431 or processes, all too often the choice of scale, be it spatial, temporal or phylogenetic, is influenced  
432 by data availability or other logistical concerns. Instead, the scale of an investigation should be  
433 chosen based on a specific objective or question whenever possible. For example, phylogenies of  
434 higher taxa may not be appropriate for evaluating the processes of community assembly that  
435 typically take place across small phylogenetic scales. To test the hypothesis that competition  
436 reduces species coexistence locally, for example, small phylogenetic scales (e.g. genera, or clades  
437 where species can be reasonably assumed to compete with each other should be preferred to large  
438 scales where most species are unlikely to compete (e.g. the entire classes, such as birds and  
439 mammals). However, even with a specific question at hand, it can be difficult to choose a single  
440 most appropriate phylogenetic scale. Therefore, evaluating multiple phylogenetic extents or grains  
441 should be considered.

442

## 443 **Multiple phylogenetic scales**

444 Simultaneous consideration of multiple phylogenetic scales may be particularly important in large  
445 phylogenies because different clades within such phylogenies may show different patterns with  
446 respect to the attribute of interest (e.g. diversification rate, the strength of niche conservatism,  
447 patterns of community phylogenetic structure) (Figure 1). For example, Cetacean systematists had  
448 long been perplexed as to why there is little correspondence between diversification dynamics  
449 estimated from the fossil record and phylogenetic trees (Quental & Marshall, 2010; Morlon *et al.*,  
450 2011). The correspondence between the two datasets emerged only when diversification dynamics  
451 were evaluated independently for clades within cetaceans (whales, dolphins, and porpoises) as  
452 opposed to cetaceans as a whole. In this case, each clade appeared to have its own dynamics which  
453 were obscured when the entire tree was evaluated (Morlon *et al.*, 2011).

454

455 In some cases, it may be difficult or even undesirable to specify, a priori, a specific set of scales.  
456 It might be instead more illuminating to study how the attribute of interest varies across an  
457 inclusive range of scales. There are several approaches, originating in community phylogenetics,  
458 which allow for such cross-scale analyses and return results for each node of the phylogenetic tree  
459 (Leibold *et al.*, 2010; Pavoine *et al.*, 2010; Borregaard *et al.*, 2014; Table 1). For example, the  
460 method developed by Borregaard *et al.* (2014) identifies nodes whose descendant clades



461 underwent conspicuous geographic, phenotypic, or ecological shifts. In evolutionary research,  
462 evaluation of all nodes is not uncommon, and multiple tools have been developed to identify shifts  
463 in diversification rates and clades with conspicuously fast or slow diversification (Alfaro *et al.*,  
464 2009; Rabosky, 2014; Table 1). However, statistical analyses that would include all nodes of the  
465 phylogeny remain relatively scarce (e.g., Buckley *et al.*, 2010; Machac *et al.*, 2012), and most  
466 studies analyze selected clades only, despite the often cited concerns that the selection of clades is  
467 rarely random, reflects our prior biases, and might influence the analysis profoundly (Phillimore  
468 & Price, 2008).

469  
470 Two potential issues associated with the evaluation of all nodes are data non-independence and  
471 nestedness. Non-independence can be readily accommodated by widely used comparative methods  
472 (e.g. PIC, PGLS) (Hurlbert, 1984; Felsenstein, 1985). These methods typically estimate the same  
473 parameters as their conventional counterparts (e.g. intercepts, regression slopes, group means) but  
474 adjust the confidence intervals of these parameters based on the inferred degree of phylogenetic  
475 correlation in the data (Hurlbert, 1984; Felsenstein, 1985). The nestedness of the data is more  
476 difficult to accommodate. For example, the diversification rate of a clade is inherently determined  
477 by the rate values across its constituent sub-clades. Nestedness therefore extends beyond the  
478 phylogenetic correlation of rate values and reflects how the value for a clade is produced by the  
479 sub-clade values. This information cannot be readily accommodated under the currently available  
480 comparative methods whose phylogenetic corrections consequently cannot guarantee proper  
481 estimates of statistical significance across nested data. For these reasons, we argue that parameter  
482 estimates can be extracted, compared, and analyzed across nested clades, but their significance  
483 needs to be interpreted cautiously. New theory that would illuminate how different attributes of  
484 interest (e.g. diversification rates, regression slopes, phylogenetic signal) combine and compound  
485 across nested hierarchies, as well as the methods to capture these correlations, are clearly needed.

486

### 487 **Phylogenetic scaling**

488 Statistical methods that evaluate all clades (nodes) in a given phylogeny (Pavoine *et al.*, 2010;  
489 Borregaard *et al.*, 2014; Rabosky, 2014) can be used to explore phylogenetic scaling. Scaling is a  
490 systematic trend along the scale axis in the attribute of interest. For example, diversification rate  
491 or net relatedness index (NRI; Webb *et al.*, 2002) may change systematically with increasing  
492 phylogenetic scale (Cavender-Bares *et al.*, 2009).

493 Phylogenetic scaling should be most prevalent across mutually nested clades because the patterns  
494 associated with larger clades are determined by the patterns of clades nested within them (or vice  
495 versa). For example, diversification rate of a clade is determined by the rate values of its subclades,  
496 similarly as species richness of a spatial plot is determined by the richness of its subplots.  
497 Consequently, it should be possible to predict the value of an attribute (e.g. diversification rate,  
498 regression slopes, phylogenetic signal) at a particular phylogenetic scale from the knowledge of  
499 those values across other scales, much like it is possible to estimate species richness within large  
500 geographic areas, based on the knowledge of richness within small areas (Storch *et al.*, 2012).  
501 When characterized mathematically, phylogenetic scaling should allow for predictions across  
502 phylogenetic scales not covered by the phylogeny at hand (i.e. upscaling or downscaling).

503

### 504 **Domains of phylogenetic scale**

505 When moving along the scale axis, the values of an attribute might sometimes change abruptly.  
506 Such discontinuities provide the opportunity to delimit domains of phylogenetic scale (Box 2).  
507 Domains are discrete segments of a phylogeny, such as monophyletic clades, taxonomic ranks, or  
508 tree depth, which show homogeneity in the attribute of interest (i.e. diversification rate, statistical  
509 correlation, or phylogenetic signal). By definition, the attribute does not vary substantially within  
510 a domain but changes between domains. Phylogenetic domains may therefore provide insights into  
511 the processes which operate over different segments of a phylogenetic tree.

512

513 Traditionally, phylogenetic domains were delimited by taxonomists whose objective was to  
514 organize species into biologically meaningful units, such as families, orders, or classes. These units  
515 are based mostly on morphological and ecological attributes. However, phylogenetic domains can  
516 also consist of clades that show diversification homogeneity, similar rates of morphological  
517 evolution, or similar life-history trade-offs. Therefore, the domains may be delimited based on key  
518 innovations, episodes of historical dispersals, or extinction events, but also statistically, using  
519 quantitative methods without the prior knowledge of the evolutionary history of a clade. While the  
520 statistical approach may be more transparent and reproducible, the resulting domains may be  
521 harder to interpret biologically. Nonetheless, statistically delimited domains may reveal otherwise  
522 unnoticed evolutionary events and potentially important breaks in the clade's history that may have  
523 shaped its extant diversity.

524

525 Phylogenetic domains may also facilitate statistical inference, given that most comparative  
526 methods assume that the attributes analyzed are homogeneous (e.g. regression slopes do not vary  
527 across genera within the analyzed family, diversification is homogenous across the analyzed  
528 lineages) and return spurious results when applied to clades that show a mixture of patterns and  
529 processes (Morlon *et al.*, 2011; O'Meara, 2012). Phylogenetic domains may therefore help to  
530 identify when comparative methods report reasonably reliable results and when their conclusions  
531 must be interpreted with caution because the results span different domains and the underlying  
532 assumptions have been violated.

533

## 534 **Conclusion**

535

536 It is well established that different processes dominate over different spatial and temporal scales.  
537 Phylogenetic scale, however, has received limited attention although much research in ecology  
538 and evolution relies on molecular phylogenies (Table 1). Explicit consideration of phylogenetic  
539 scale, scale dependence, phylogenetic scaling, and the domains of phylogenetic scale can therefore  
540 inform multiple disciplines in the field (e.g. diversification analysis, community ecology,  
541 biogeography and macroecology).

542

543 We have discussed phylogenetic scale largely in isolation from spatial and temporal scales, but  
544 these types of scale will often be related. For instance, competitive exclusion may be prominent  
545 among closely related species within local communities over short time periods (Cavender-Bares  
546 *et al.*, 2009). In contrast, plate tectonics might influence deeper nodes in a phylogeny and operate  
547 over broad geographic and temporal scales (Willis & Whittaker, 2002). In some notable cases,  
548 however, the scales may not be related. Diversity anomalies, such as New Caledonia or  
549 Madagascar, represent examples of decoupling where rich biotas that encompass extensive  
550 phylogenetic scales diversified in a relatively small region (Warren *et al.*, 2010; Espeland &  
551 Murienne, 2011). In contrast, recent radiations within grasses and rodents have had a large  
552 geographic footprint but encompass only limited phylogenetic scales (Edwards *et al.*, 2010;  
553 Edwards & Smith, 2010) (Edwards *et al.* 2010). Evaluating when different types of scale are  
554 coupled (or decoupled) may yield new insights into the evolutionary history of different clades  
555 and regions (Willis & Whittaker, 2002).

556 We hope that the perspective presented here will spur further theoretical, empirical, and  
557 methodological research. Explicit consideration of phylogenetic scale may turn our focus away  
558 from the importance of particular mechanisms (diversification, trait evolution, niche conservatism)  
559 toward the appreciation for the interplay of multiple processes which together, but over different  
560 phylogenetic scales, shape the diversity of life.

561

## 562 **Acknowledgements**

563

564 Funding was provided by the NSF program Dimensions of Biodiversity (DEB-1136586) and by  
565 the Grant Agency of the Czech Republic (14-36098G).

566

## 567 **References**

568 Alfaro, M.E., Santini, F., Brock, C., Alamillo, H., Dornburg, A., Rabosky, D.L., Carnevale, G. &  
569 Harmon, L.J. (2009) Nine exceptional radiations plus high turnover explain species  
570 diversity in jawed vertebrates. *Proceedings of the National Academy of Sciences of the*  
571 *United States of America*, **106**, 13410-13414.

572 Alroy, J. (1996) Constant extinction, constrained diversification, and uncoordinated stasis in  
573 North American mammals. *Palaeogeography Palaeoclimatology Palaeoecology*, **127**,  
574 285-311.

575 Benton, M.J. & Emerson, B.C. (2007) How did life become so diverse? The dynamics of  
576 diversification according to the fossil record and molecular phylogenetics.  
577 *Palaeontology*, **50**, 23-40.

578 Blomberg, S.P., Garland, T. & Ives, A.R. (2003) Testing for phylogenetic signal in comparative  
579 data: Behavioral traits are more labile. *Evolution*, **57**, 717-745.

580 Borregaard, M.K., Rahbek, C., Fjeldsa, J., Parra, J.L., Whittaker, R.J. & Graham, C.H. (2014)  
581 Node-based analysis of species distributions. *Methods in Ecology and Evolution*, **5**, 1225-  
582 1235.

583 Buckley, L.B., Davies, T.J., Ackerly, D.D., Kraft, N.J.B., Harrison, S.P., Anacker, B.L., Cornell,  
584 H.V., Damschen, E.I., Grytnes, J.A., Hawkins, B.A., McCain, C.M., Stephens, P.R. &

- 585 Wiens, J.J. (2010) Phylogeny, niche conservatism and the latitudinal diversity gradient in  
586 mammals. *Proceedings of the Royal Society B-Biological Sciences*, **277**, 2131-2138.
- 587 Cahill, A.E., Aiello-Lammens, M.E., Fisher-Reid, M.C., Hua, X., Karanewsky, C.J., Ryu, H.Y.,  
588 Sbeglia, G.C., Spagnolo, F., Waldron, J.B., Warsi, O. & Wiens, J.J. (2013) How does  
589 climate change cause extinction? *Proceedings of the Royal Society B-Biological Sciences*,  
590 **280**
- 591 Cavender-Bares, J., Kozak, K.H., Fine, P.V.A. & Kembel, S.W. (2009) The merging of  
592 community ecology and phylogenetic biology. *Ecology Letters*, **12**, 693-715.
- 593 Cotgreave, P. & Stockley, P. (1994) Body-size, insectivory and abundance in assemblages of  
594 small mammals. *Oikos*, **71**, 89-96.
- 595 Damuth, J. (1981) Population-density and body size in mammals. *Nature*, **290**, 699-700.
- 596 Edwards, E.J., Osborne, C.P., Stromberg, C.A.E., Smith, S.A., Bond, W.J., Christin, P.A.,  
597 Cousins, A.B., Duvall, M.R., Fox, D.L., Freckleton, R.P., Ghannoum, O., Hartwell, J.,  
598 Huang, Y.S., Janis, C.M., Keeley, J.E., Kellogg, E.A., Knapp, A.K., Leakey, A.D.B.,  
599 Nelson, D.M., Saarela, J.M., Sage, R.F., Sala, O.E., Salamin, N., Still, C.J., Tiplle, B. &  
600 Consortium, C.G. (2010) The origins of C-4 grasslands: integrating evolutionary and  
601 ecosystem science. *Science*, **328**, 587-591.
- 602 Espeland, M. & Murienne, J. (2011) Diversity dynamics in New Caledonia: towards the end of  
603 the museum model? *Bmc Evolutionary Biology*, **11**
- 604 Faith, D.P. (1992) Conservation evaluation and phylogenetic diversity. *Biological Conservation*,  
605 **61**, 1-10.
- 606 Felsenstein, J. (1985) Phylogenies and the comparative method. *American Naturalist*, **125**, 1-15.
- 607 Freckleton, R.P., Harvey, P.H. & Pagel, M. (2002) Phylogenetic analysis and comparative data:  
608 A test and review of evidence. *American Naturalist*, **160**, 712-726.
- 609 Gerhold, P., Cahill, J.F., Winter, M., Bartish, I.V. & Prinzing, A. (2015) Phylogenetic patterns  
610 are not proxies of community assembly mechanisms (they are far better). *Functional*  
611 *Ecology*, **29**, 600-614.
- 612 Glor, R.E. (2010) Phylogenetic insights on adaptive radiation. *Annual Review of Ecology,*  
613 *Evolution, and Systematics, Vol 41* (ed. by D.J. Futuyma, H.B. Shafer and D. Simberloff),  
614 pp. 251-270.
- 615 Godoy, O., Kraft, N.J.B. & Levine, J.M. (2014) Phylogenetic relatedness and the determinants of  
616 competitive outcomes. *Ecology Letters*, **17**, 836-844.

- 617 Hansen, T.F. (1997) Stabilizing selection and the comparative analysis of adaptation. *Evolution*,  
618 **51**, 1341-1351.
- 619 Harmon, L.J. & Harrison, S. (2015) Species diversity is dynamic and unbounded at local and  
620 continental scales. *American Naturalist*, **185**, 584-593.
- 621 Hurlbert, S.H. (1984) Pseudoreplication and the design of ecological field experiments.  
622 *Ecological Monographs*, **54**, 187-211.
- 623 Isaac, N.J.B., Storch, D. & Carbone, C. (2011) Taxonomic variation in size-density relationships  
624 challenges the notion of energy equivalence. *Biology Letters*, **7**, 615-618.
- 625 Jackson, S.T. & Weng, C.Y. (1999) Late quaternary extinction of a tree species in eastern North  
626 America. *Proceedings of the National Academy of Sciences of the United States of*  
627 *America*, **96**, 13847-13852.
- 628 Jetz, W., Thomas, G.H., Joy, J.B., Hartmann, K. & Mooers, A.O. (2012) The global diversity of  
629 birds in space and time. *Nature*, **491**, 444-448.
- 630 Kindlman, Schodelbauerova & Dixon (2007) Inverse latitudinal gradients in species diversity.  
631 *Scaling biodiversity* (ed. by D. Storch, Marquet, P. And Brown J.H.). Cambridge.
- 632 Leibold, M.A., Economo, E.P. & Peres-Neto, P. (2010) Metacommunity phylogenetics:  
633 separating the roles of environmental filters and historical biogeography. *Ecology Letters*,  
634 **13**, 1290-1299.
- 635 Lessard, J.P., Belmaker, J., Myers, J.A., Chase, J.M. & Rahbek, C. (2012) Inferring local  
636 ecological processes amid species pool influences. *Trends in Ecology & Evolution*, **27**,  
637 600-607.
- 638 Levin, S.A. (1992) The problem of pattern and scale in ecology. *Ecology*, **73**, 1943-1967.
- 639 Losos, J.B. (2008) Phylogenetic niche conservatism, phylogenetic signal and the relationship  
640 between phylogenetic relatedness and ecological similarity among species. *Ecology*  
641 *Letters*, **11**, 995-1003.
- 642 Machac, A., Zrzavy, J., Smrckova, J. & Storch, D. (2012) Temperature dependence of  
643 evolutionary diversification: differences between two contrasting model taxa support the  
644 metabolic theory of ecology. *Journal of Evolutionary Biology*, **25**, 2449-2456.
- 645 Magallon, S. & Sanderson, M.J. (2001) Absolute diversification rates in angiosperm clades.  
646 *Evolution*, **55**, 1762-1780.
- 647 Mayfield, M.M. & Levine, J.M. (2010) Opposing effects of competitive exclusion on the  
648 phylogenetic structure of communities. *Ecology Letters*, **13**, 1085-1093.

- 649 Morlon, H., Potts, M.D. & Plotkin, J.B. (2010) Inferring the dynamics of diversification: a  
650 coalescent approach. *Plos Biology*, **8**
- 651 Morlon, H., Parsons, T.L. & Plotkin, J.B. (2011) Reconciling molecular phylogenies with the  
652 fossil record. *Proceedings of the National Academy of Sciences of the United States of*  
653 *America*, **108**, 16327-16332.
- 654 Munkemuller, T., Gallien, L., Lavergne, S., Renaud, J., Roquet, C., Abdulhak, S., Dullinger, S.,  
655 Garraud, L., Guisan, A., Lenoir, J., Svenning, J.C., Van Es, J., Vittoz, P., Willner, W.,  
656 Wohlgemuth, T., Zimmermann, N.E. & Thuiller, W. (2014) Scale decisions can reverse  
657 conclusions on community assembly processes. *Global Ecology and Biogeography*, **23**,  
658 620-632.
- 659 O'Meara, B.C. (2012) Evolutionary inferences from phylogenies: a review of methods. *Annual*  
660 *Review of Ecology, Evolution, and Systematics*, Vol 43 (ed. by D.J. Futuyma), pp. 267-  
661 285.
- 662 Parra, J.L., Rahbek, C., McGuire, J.A. & Graham, C.H. (2011) Contrasting patterns of  
663 phylogenetic assemblage structure along the elevational gradient for major hummingbird  
664 clades. *Journal of Biogeography*, **38**, 2350-2361.
- 665 Pavoine, S., Baguette, M. & Bonsall, M.B. (2010) Decomposition of trait diversity among the  
666 nodes of a phylogenetic tree. *Ecological Monographs*, **80**, 485-507.
- 667 Phillimore, A.B. & Price, T.D. (2008) Density-dependent cladogenesis in birds. *Plos Biology*, **6**,  
668 483-489.
- 669 Preston, F.W. (1948) The commonness, and rarity, of species. *Ecology*, **29**, 254-283.
- 670 Price, T.D., Hooper, D.M., Buchanan, C.D., Johansson, U.S., Tietze, D.T., Alstrom, P., Olsson,  
671 U., Ghosh-Harihar, M., Ishtiaq, F., Gupta, S.K., Martens, J., Harr, B., Singh, P. &  
672 Mohan, D. (2014) Niche filling slows the diversification of Himalayan songbirds. *Nature*,  
673 **509**, 222-+.
- 674 Pybus, O.G. & Harvey, P.H. (2000) Testing macro-evolutionary models using incomplete  
675 molecular phylogenies. *Proceedings of the Royal Society B-Biological Sciences*, **267**,  
676 2267-2272.
- 677 Quental, T.B. & Marshall, C.R. (2010) Diversity dynamics: molecular phylogenies need the  
678 fossil record. *Trends in Ecology & Evolution*, **25**, 434-441.
- 679 Quental, T.B. & Marshall, C.R. (2013) How the red queen drives terrestrial mammals to  
680 extinction. *Science*, **341**, 290-292.

- 681 Rabosky, D.L. (2009) Ecological limits and diversification rate: alternative paradigms to explain  
682 the variation in species richness among clades and regions. *Ecology Letters*, **12**, 735-743.
- 683 Rabosky, D.L. (2014) Automatic detection of key innovations, rate shifts, and diversity-  
684 dependence on phylogenetic trees. *Plos One*, **9**
- 685 Rabosky, D.L. & Hurlbert, A.H. (2015) Species richness at continental scales is dominated by  
686 ecological limits. *American Naturalist*, **185**, 572-583.
- 687 Rabosky, D.L., Slater, G.J. & Alfaro, M.E. (2012) Clade age and species richness are decoupled  
688 across the eukaryotic tree of life. *Plos Biology*, **10**
- 689 Rabosky, D.L., Santini, F., Eastman, J., Smith, S.A., Sidlauskas, B., Chang, J. & Alfaro, M.E.  
690 (2013) Rates of speciation and morphological evolution are correlated across the largest  
691 vertebrate radiation. *Nature Communications*, **4**
- 692 Rosenzweig, M.L. (1995) *Species diversity in space and time*. Cambridge University Press,  
693 Cambridge.
- 694 Sizing, A.L., Storch, D. & Keil, P. (2009) Rapoport's rule, species tolerances, and the latitudinal  
695 diversity gradient: geometric considerations. *Ecology*, **90**, 3575-3586.
- 696 Storch, D. & Sizing, A.L. (2008) The concept of taxon invariance in ecology: do diversity  
697 patterns vary with changes in taxonomic resolution? *Folia Geobotanica*, **43**, 329-344.
- 698 Storch, D., Keil, P. & Jetz, W. (2012) Universal species-area and endemics-area relationships at  
699 continental scales. *Nature*, **488**, 78-+.
- 700 Stuart, A.J. (1991) Mammalian extinctions in the late pleistocene of Northern Eurasia and North-  
701 America. *Biological Reviews of the Cambridge Philosophical Society*, **66**, 453-562.
- 702 Swenson, N.G., Enquist, B.J., Thompson, J. & Zimmerman, J.K. (2007) The influence of spatial  
703 and size scale on phylogenetic relatedness in tropical forest communities. *Ecology*, **88**,  
704 1770-1780.
- 705 Warren, B.H., Strasberg, D., Bruggemann, J.H., Prys-Jones, R.P. & Thebaud, C. (2010) Why  
706 does the biota of the Madagascar region have such a strong Asiatic flavour? *Cladistics*,  
707 **26**, 526-538.
- 708 Webb, C.O., Ackerly, D.D., McPeck, M.A. & Donoghue, M.J. (2002) Phylogenies and  
709 community ecology. *Annual Review of Ecology and Systematics*, **33**, 475-505.
- 710 Wiens, J.A. (1989) Spatial scaling in ecology. *Functional Ecology*, **3**, 385-397.
- 711 Wiens, J.J. (2011) The causes of species richness patterns across space, time and clades and the  
712 role of "ecological limits". *Quarterly Review of Biology*, **86**, 75-96.



- 713 Wiens, J.J. & Donoghue, M.J. (2004) Historical biogeography, ecology and species richness.  
714 *Trends in Ecology & Evolution*, **19**, 639-644.
- 715 Wiens, J.J. & Graham, C.H. (2005) Niche conservatism: Integrating evolution, ecology, and  
716 conservation biology. *Annual Review of Ecology Evolution and Systematics*, pp. 519-539.
- 717 Willis, K.J. & Whittaker, R.J. (2002) Species diversity - Scale matters. *Science*, **295**, 1245-1250.
